# Supplementary material for: Exosomal Vimentin from Adipocyte Progenitors Protects Fibroblasts against Osmotic Stress and Inhibits Apoptosis to Enhance Wound Healing
Source: MDPI journal article supplement (doi:10.3390/ijms22094678), 2021-04-28
Supplement: s1 [file s1]

## Supplementary Figure S1

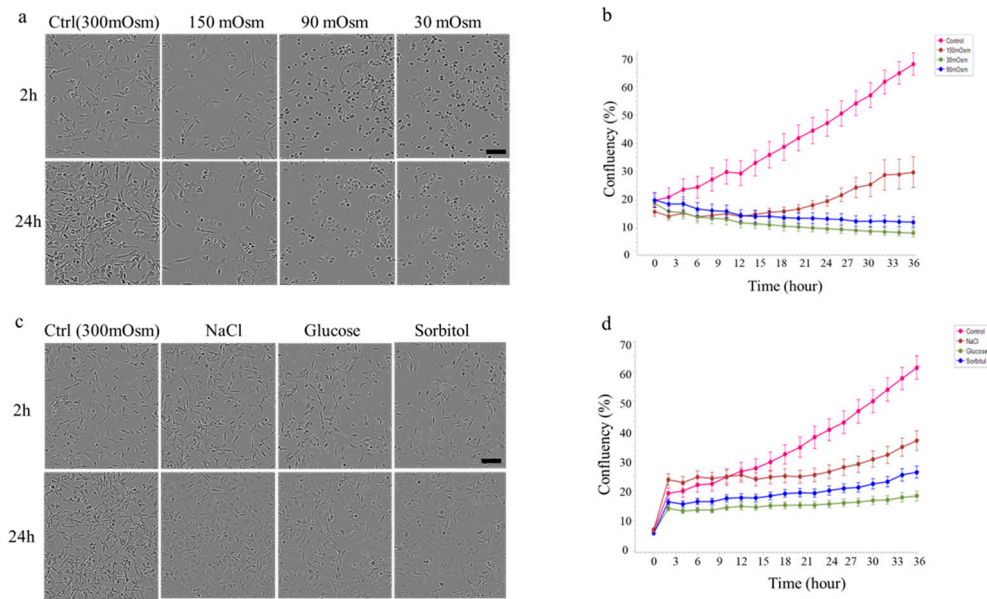

**Figure S1.** Hypo and Hyper-osmotic stress media optimization. **(a)** Representative images and **(b)** cell confluency of WT-APCs incubated in different hypotonic media following ratios: 1:9, 1:4, and 1:1 to obtain 30 mOsm, 60 mOsm, and 150 mOsm, respectively after 24 h. **(c)** Representative images and **(d)** cell confluency of WT-APCs incubated in different hypertonic media with the addition of 100 mM NaCl, 200 mM sorbitol, or 200 mM glucose for an increase of 200 mOsm kg<sup>-1</sup> H<sub>2</sub>O after 24 h. Normal media (300mOsm) were used as control. Scale bar: 100  $\mu$ m. \*  $p < 0.05$ , \*\*  $p < 0.01$ , \*\*\*  $p < 0.00$ .
